# Supplementary material
Source: MDPI journal article supplement (https://www.mdpi.com/2075-163X/12/3/388)
Supplement: s1 [file s1]

# Supplementary Materials: Petrogenesis and Tectonic Setting of the Madeng Dacite, SW Sanjiang Indosinian Orogen: Evidence from Zircon U-Pb-Hf Isotopes, and Whole-Rock Geochemistry and Sr-Nd Isotopes

Gang Huang , Liang-Liang Zhuang \*, Ya-Qi Yang , Li-Dan Tian , Wei Wu and Jin-Hong Liu

**Table S1.** Summary of geochronological data of the Paleo-Tethyan magmatic rocks in Deqin-Weixi-Madeng area.

| Number | Sample No.  | Lithology    | Age (Ma) | Error | Reference |
|--------|-------------|--------------|----------|-------|-----------|
| 1      | CX034-1     | dacite       | 241      | 1     | [12]      |
| 2      | CX021-1     | dacite       | 208.2    | 2.1   | [12]      |
|        | CX024-2     | andesite     | 211.4    | 1.4   |           |
|        | CX025-1     | andesite     | 227.3    | 1.4   |           |
|        | CX025-7     | andesite     | 238.6    | 2     |           |
|        | CX026-8     | andesite     | 236.9    | 1.8   |           |
|        | CX027-2     | dacite       | 248      | 1     |           |
|        | CX028-1     | andesite     | 247.1    | 1.4   |           |
|        | CX028-2     | andesite     | 247.5    | 2.1   |           |
|        | CX028-11    | dacite       | 248      | 2     |           |
| 3      | CX031-4     | diorite      | 271.8    | 2.9   | [16]      |
|        | YL20        | granodiorite | 234.1    | 1.2   |           |
| 4      | YL27        | granodiorite | 235.6    | 1.2   | [8]       |
|        | BW-1/BW-6   | granite      | 233.9    | 1.4   |           |
|        | LiN-1/LiN-2 | granite      | 233.1    | 1.4   |           |
| 5      | LuN-1/LiN-2 | granite      | 231      | 1.6   | [12]      |
|        | CX044-11    | andesite     | 212      | 6     |           |
| 6      | JJD02-1     | basalt       | 246.1    | 2     | [10]      |
|        | JJD03-2     | rhyolite     | 244.6    | 2.6   |           |
|        | JJD03-9     | rhyolite     | 246.7    | 3.1   |           |
|        | LCTK01-1    | rhyolite     | 245.6    | 2.4   |           |
| 7      | SS03        | gabbro       | 343.5    | 2.7   | [43]      |
| 8      | SJ106       | diorite      | 251      | 2     | [11]      |
|        | SJ109       | tonalite     | 253      | 4     |           |
|        | SJ133       | granodiorite | 249      | 2     |           |
|        | SJ142       | granodiorite | 248      | 2     |           |
| 9      | 014-3       | granodiorite | 239      | 6     | [17]      |
| 10     | YZ01-1      | rhyolite     | 247.7    | 1.7   | [10]      |
|        | YZ01-12     | rhyolite     | 248.5    | 2.3   |           |
| 11     | WD01        | amphibolite  | 297.1    | 2     | [44]      |
|        | WD02        | tonalite     | 306.2    | 4.6   |           |
|        | WD03        | diabase      | 281.3    | 1.8   |           |
|        | WD05        | gabbro       | 301      | 2.9   |           |
| 12     | 005-8       | granite      | 214      | 6     | [17]      |
| 13     | DX127-1     | granite      | 240      | 3     | [15]      |
|        | DX127-6     | granite      | 243.1    | 3     |           |
|        | DX134-1     | rhyolite     | 244.8    | 3.8   |           |
|        | DX134-7     | dacite       | 248.8    | 3.3   |           |
|        | DX135-3     | mylonite     | 246.5    | 3.5   |           |
|        | DX135-11    | mylonite     | 250.7    | 4.3   |           |
|        | DX135-13    | mylonite     | 244.8    | 3.1   |           |
| 14     | B13         | diorite      | 297      | 5     | [23]      |
| 15     | B22         | gabbro       | 303      | 4     | [23]      |
| 16     | DX043-1     | tuff         | 236.9    | 5.8   | [12]      |
|        | DX043-2     | andesite     | 234.1    | 3.7   |           |
| 17     | 19S86-1     | andesite     | 236      | 4     | [18]      |
| 18     | QD-5        | rhyolite     | 237.7    | 3.5   | [12]      |
| 19     | D2043-2     | diabase      | 244.8    | 3.1   | [15]      |
|        | D5059-11    | dacite       | 247.4    | 2.3   |           |



|    |  |          |                |       |     |      |
|----|--|----------|----------------|-------|-----|------|
|    |  | D5060-3  | dacite         | 247.4 | 2.8 |      |
|    |  | D5061-4  | basalt         | 263.2 | 7.6 |      |
|    |  | D5060-7  | dacite         | 247   | 2.5 |      |
|    |  | D5061-9  | dacite         | 250   | 2.7 |      |
|    |  | D5061-10 | dacite         | 250.1 | 2.4 |      |
| 20 |  | D2047-3  | dacite         | 247   | 4.3 | [14] |
|    |  | D3052-1  | rhyolite       | 250   | 4.3 |      |
|    |  | D3053-1  | rhyolite       | 246.7 | 3.5 |      |
|    |  | D3055-5A | rhyolitic lava | 244   | 5.2 |      |
| 21 |  | DX090-2  | tuff           | 249.1 | 2.5 | [13] |
|    |  | DX091-2  | tuff           | 257.9 | 4.1 |      |
|    |  | DX091-3  | tuff           | 255.7 | 5.3 |      |
|    |  | DX091-5  | tuff           | 247.7 | 2.7 |      |

Table S2 Zircon U-Pb data of Madeng dacite

| Spot No.                                        | Concentration (ppm) |     | Th/U | ratio                             |        |                                  |        |                                  |        | Age (Ma)                          |       |                                  |     |                                  |     |
|-------------------------------------------------|---------------------|-----|------|-----------------------------------|--------|----------------------------------|--------|----------------------------------|--------|-----------------------------------|-------|----------------------------------|-----|----------------------------------|-----|
|                                                 | Th                  | U   |      | $^{207}\text{Pb}/^{206}\text{Pb}$ |        | $^{207}\text{Pb}/^{235}\text{U}$ |        | $^{206}\text{Pb}/^{238}\text{U}$ |        | $^{207}\text{Pb}/^{206}\text{Pb}$ |       | $^{207}\text{Pb}/^{235}\text{U}$ |     | $^{206}\text{Pb}/^{238}\text{U}$ |     |
|                                                 |                     |     |      | $\pm 1\sigma$                     |        | $\pm 1\sigma$                    |        | $\pm 1\sigma$                    |        | $\pm 1\sigma$                     |       | $\pm 1\sigma$                    |     | $\pm 1\sigma$                    |     |
| MD20-1-2 dacite Age=243.5±0.9 Ma(MSWD=1.1,n=27) |                     |     |      |                                   |        |                                  |        |                                  |        |                                   |       |                                  |     |                                  |     |
| MD20-1-2-01                                     | 153                 | 438 | 0.35 | 0.0497                            | 0.0019 | 0.2627                           | 0.0097 | 0.0385                           | 0.0004 | 189                               | 88.9  | 237                              | 7.8 | 243                              | 2.4 |
| MD20-1-2-02                                     | 47                  | 267 | 0.17 | 0.0490                            | 0.0020 | 0.2591                           | 0.0103 | 0.0386                           | 0.0005 | 150                               | 96.3  | 234                              | 8.3 | 244                              | 2.9 |
| MD20-1-2-03                                     | 80                  | 310 | 0.26 | 0.0506                            | 0.0020 | 0.2641                           | 0.0103 | 0.0380                           | 0.0004 | 233                               | 95.4  | 238                              | 8.3 | 240                              | 2.6 |
| MD20-1-2-04                                     | 168                 | 523 | 0.32 | 0.0507                            | 0.0016 | 0.2686                           | 0.0086 | 0.0384                           | 0.0004 | 228                               | 74.1  | 242                              | 6.9 | 243                              | 2.2 |
| MD20-1-2-05                                     | 89                  | 366 | 0.24 | 0.0504                            | 0.0019 | 0.2690                           | 0.0102 | 0.0387                           | 0.0004 | 213                               | 88.9  | 242                              | 8.2 | 245                              | 2.4 |
| MD20-1-2-06                                     | 118                 | 378 | 0.31 | 0.0507                            | 0.0019 | 0.2689                           | 0.0098 | 0.0386                           | 0.0004 | 233                               | 54.6  | 242                              | 7.9 | 244                              | 2.3 |
| MD20-1-2-07                                     | 142                 | 451 | 0.31 | 0.0510                            | 0.0017 | 0.2738                           | 0.0088 | 0.0389                           | 0.0004 | 243                               | 78.7  | 246                              | 7.0 | 246                              | 2.2 |
| MD20-1-2-08                                     | 76                  | 285 | 0.27 | 0.0493                            | 0.0022 | 0.2667                           | 0.0120 | 0.0392                           | 0.0005 | 161                               | 103.7 | 240                              | 9.6 | 248                              | 2.9 |
| MD20-1-2-09                                     | 148                 | 527 | 0.28 | 0.0486                            | 0.0018 | 0.2546                           | 0.0090 | 0.0381                           | 0.0004 | 128                               | 88.9  | 230                              | 7.3 | 241                              | 2.5 |
| MD20-1-2-10                                     | 148                 | 516 | 0.29 | 0.0513                            | 0.0016 | 0.2994                           | 0.0098 | 0.0422                           | 0.0006 | 254                               | 67.6  | 266                              | 7.7 | 266                              | 3.5 |
| MD20-1-2-11                                     | 136                 | 443 | 0.31 | 0.0489                            | 0.0017 | 0.2631                           | 0.0089 | 0.0390                           | 0.0005 | 143                               | 81.5  | 237                              | 7.2 | 247                              | 2.9 |
| MD20-1-2-12                                     | 126                 | 430 | 0.29 | 0.0477                            | 0.0018 | 0.2540                           | 0.0092 | 0.0388                           | 0.0004 | 83.4                              | 88.9  | 230                              | 7.5 | 245                              | 2.6 |
| MD20-1-2-13                                     | 82                  | 306 | 0.27 | 0.0489                            | 0.0019 | 0.2547                           | 0.0101 | 0.0377                           | 0.0004 | 143                               | 88.0  | 230                              | 8.1 | 238                              | 2.4 |
| MD20-1-2-14                                     | 83                  | 299 | 0.28 | 0.0503                            | 0.0021 | 0.2633                           | 0.0106 | 0.0379                           | 0.0004 | 209                               | 89.8  | 237                              | 8.5 | 240                              | 2.3 |
| MD20-1-2-15                                     | 102                 | 317 | 0.32 | 0.0497                            | 0.0020 | 0.2653                           | 0.0102 | 0.0389                           | 0.0004 | 189                               | 94.4  | 239                              | 8.2 | 246                              | 2.8 |
| MD20-1-2-16                                     | 161                 | 498 | 0.32 | 0.0494                            | 0.0016 | 0.2629                           | 0.0082 | 0.0386                           | 0.0004 | 169                               | 71.3  | 237                              | 6.6 | 244                              | 2.5 |
| MD20-1-2-17                                     | 98                  | 326 | 0.30 | 0.0501                            | 0.0020 | 0.2678                           | 0.0108 | 0.0389                           | 0.0005 | 198                               | 100.9 | 241                              | 8.6 | 246                              | 2.9 |
| MD20-1-2-18                                     | 115                 | 430 | 0.27 | 0.0470                            | 0.0015 | 0.2453                           | 0.0078 | 0.0378                           | 0.0004 | 55.7                              | 68.5  | 223                              | 6.4 | 239                              | 2.3 |
| MD20-1-2-19                                     | 102                 | 340 | 0.30 | 0.0492                            | 0.0019 | 0.2628                           | 0.0097 | 0.0388                           | 0.0004 | 167                               | 88.9  | 237                              | 7.8 | 245                              | 2.6 |
| MD20-1-2-20                                     | 121                 | 463 | 0.26 | 0.0502                            | 0.0018 | 0.2633                           | 0.0093 | 0.0380                           | 0.0004 | 211                               | 81.5  | 237                              | 7.4 | 240                              | 2.6 |
| MD20-1-2-21                                     | 154                 | 520 | 0.30 | 0.0490                            | 0.0017 | 0.2600                           | 0.0087 | 0.0383                           | 0.0004 | 150                               | 77.8  | 235                              | 7.0 | 242                              | 2.2 |
| MD20-1-2-22                                     | 135                 | 449 | 0.30 | 0.0503                            | 0.0017 | 0.2658                           | 0.0089 | 0.0383                           | 0.0004 | 209                               | 77.8  | 239                              | 7.2 | 242                              | 2.3 |
| MD20-1-2-23                                     | 147                 | 488 | 0.30 | 0.0510                            | 0.0015 | 0.2745                           | 0.0085 | 0.0389                           | 0.0004 | 239                               | 68.5  | 246                              | 6.8 | 246                              | 2.4 |



|                                                        |     |     |      |        |        |        |        |        |        |      |       |     |     |     |     |
|--------------------------------------------------------|-----|-----|------|--------|--------|--------|--------|--------|--------|------|-------|-----|-----|-----|-----|
| MD20-1-2-24                                            | 113 | 392 | 0.29 | 0.0522 | 0.0019 | 0.2769 | 0.0102 | 0.0383 | 0.0004 | 300  | 85.2  | 248 | 8.1 | 242 | 2.4 |
| MD20-1-2-25                                            | 134 | 476 | 0.28 | 0.0522 | 0.0017 | 0.2811 | 0.0089 | 0.0390 | 0.0004 | 295  | 74.1  | 251 | 7.0 | 247 | 2.3 |
| MD20-1-2-26                                            | 165 | 553 | 0.30 | 0.0516 | 0.0015 | 0.2733 | 0.0081 | 0.0383 | 0.0004 | 333  | 73.1  | 245 | 6.5 | 243 | 2.2 |
| MD20-1-2-27                                            | 134 | 485 | 0.28 | 0.0546 | 0.0020 | 0.2929 | 0.0104 | 0.0388 | 0.0004 | 398  | 76.8  | 261 | 8.2 | 245 | 2.3 |
| MD20-1-2-28                                            | 74  | 309 | 0.24 | 0.0558 | 0.0021 | 0.2988 | 0.0111 | 0.0389 | 0.0004 | 443  | 80.5  | 265 | 8.7 | 246 | 2.5 |
| <b>MD20-5-2 dacite Age=241.7±1.1 Ma(MSWD=1.6,n=28)</b> |     |     |      |        |        |        |        |        |        |      |       |     |     |     |     |
| MD20-5-2-01                                            | 122 | 426 | 0.29 | 0.0498 | 0.0017 | 0.2631 | 0.0090 | 0.0384 | 0.0004 | 183  | 79.6  | 237 | 7.3 | 243 | 2.5 |
| MD20-5-2-02                                            | 107 | 341 | 0.31 | 0.0508 | 0.0018 | 0.2681 | 0.0093 | 0.0384 | 0.0004 | 232  | 88.0  | 241 | 7.5 | 243 | 2.4 |
| MD20-5-2-03                                            | 94  | 380 | 0.25 | 0.0525 | 0.0019 | 0.2727 | 0.0095 | 0.0376 | 0.0004 | 306  | 81.5  | 245 | 7.6 | 238 | 2.3 |
| MD20-5-2-04                                            | 108 | 379 | 0.28 | 0.0539 | 0.0021 | 0.2783 | 0.0105 | 0.0376 | 0.0004 | 369  | 87.0  | 249 | 8.3 | 238 | 2.3 |
| MD20-5-2-05                                            | 74  | 300 | 0.25 | 0.0536 | 0.0023 | 0.2830 | 0.0109 | 0.0386 | 0.0004 | 354  | 100.9 | 253 | 8.6 | 244 | 2.6 |
| MD20-5-2-06                                            | 95  | 338 | 0.28 | 0.0541 | 0.0019 | 0.2838 | 0.0103 | 0.0379 | 0.0004 | 376  | 76.8  | 254 | 8.1 | 240 | 2.4 |
| MD20-5-2-07                                            | 105 | 343 | 0.31 | 0.0534 | 0.0023 | 0.2802 | 0.0118 | 0.0382 | 0.0005 | 346  | 93.5  | 251 | 9.4 | 242 | 2.9 |
| MD20-5-2-08                                            | 181 | 557 | 0.33 | 0.0538 | 0.0019 | 0.2789 | 0.0095 | 0.0376 | 0.0003 | 365  | 81.5  | 250 | 7.5 | 238 | 2.1 |
| MD20-5-2-09                                            | 77  | 289 | 0.26 | 0.0559 | 0.0023 | 0.2917 | 0.0113 | 0.0381 | 0.0005 | 456  | 92.6  | 260 | 8.8 | 241 | 2.8 |
| MD20-5-2-10                                            | 106 | 371 | 0.29 | 0.0496 | 0.0018 | 0.2610 | 0.0096 | 0.0380 | 0.0004 | 176  | 85.2  | 235 | 7.7 | 241 | 2.3 |
| MD20-5-2-11                                            | 123 | 433 | 0.28 | 0.0550 | 0.0019 | 0.2882 | 0.0095 | 0.0381 | 0.0004 | 413  | 77.8  | 257 | 7.5 | 241 | 2.2 |
| MD20-5-2-12                                            | 85  | 309 | 0.27 | 0.0553 | 0.0021 | 0.2894 | 0.0109 | 0.0379 | 0.0004 | 433  | 85.2  | 258 | 8.6 | 240 | 2.4 |
| MD20-5-2-13                                            | 363 | 644 | 0.56 | 0.0519 | 0.0015 | 0.2711 | 0.0084 | 0.0377 | 0.0004 | 280  | 68.5  | 244 | 6.7 | 239 | 2.5 |
| MD20-5-2-14                                            | 86  | 373 | 0.23 | 0.0522 | 0.0018 | 0.2729 | 0.0091 | 0.0381 | 0.0004 | 295  | 79.6  | 245 | 7.2 | 241 | 2.4 |
| MD20-5-2-15                                            | 109 | 411 | 0.26 | 0.0502 | 0.0018 | 0.2674 | 0.0099 | 0.0384 | 0.0004 | 206  | 79.6  | 241 | 7.9 | 243 | 2.4 |
| MD20-5-2-16                                            | 176 | 526 | 0.33 | 0.0529 | 0.0016 | 0.2765 | 0.0081 | 0.0378 | 0.0003 | 328  | 68.5  | 248 | 6.5 | 239 | 2.2 |
| MD20-5-2-17                                            | 170 | 526 | 0.32 | 0.0541 | 0.0017 | 0.2827 | 0.0091 | 0.0377 | 0.0003 | 376  | 76.8  | 253 | 7.2 | 239 | 2.1 |
| MD20-5-2-18                                            | 186 | 948 | 0.20 | 0.0524 | 0.0015 | 0.2733 | 0.0078 | 0.0378 | 0.0003 | 302  | 68.5  | 245 | 6.2 | 239 | 1.8 |
| MD20-5-2-19                                            | 150 | 487 | 0.31 | 0.0514 | 0.0016 | 0.2742 | 0.0086 | 0.0387 | 0.0004 | 257  | 69.4  | 246 | 6.9 | 245 | 2.3 |
| MD20-5-2-20                                            | 142 | 513 | 0.28 | 0.0507 | 0.0017 | 0.2655 | 0.0088 | 0.0378 | 0.0003 | 233  | 77.8  | 239 | 7.1 | 239 | 2.0 |
| MD20-5-2-21                                            | 135 | 454 | 0.30 | 0.0521 | 0.0017 | 0.2791 | 0.0090 | 0.0389 | 0.0004 | 300  | 77.8  | 250 | 7.2 | 246 | 2.3 |
| MD20-5-2-22                                            | 160 | 538 | 0.30 | 0.0499 | 0.0014 | 0.2697 | 0.0074 | 0.0391 | 0.0003 | 187  | 63.0  | 242 | 5.9 | 247 | 2.1 |
| MD20-5-2-23                                            | 164 | 522 | 0.32 | 0.0502 | 0.0014 | 0.2677 | 0.0074 | 0.0386 | 0.0004 | 211  | 66.7  | 241 | 6.0 | 244 | 2.3 |
| MD20-5-2-24                                            | 159 | 510 | 0.31 | 0.0479 | 0.0015 | 0.2562 | 0.0079 | 0.0388 | 0.0004 | 100  | 75.9  | 232 | 6.4 | 245 | 2.3 |
| MD20-5-2-25                                            | 142 | 433 | 0.33 | 0.0486 | 0.0017 | 0.2628 | 0.0086 | 0.0392 | 0.0004 | 132  | 76.8  | 237 | 7.0 | 248 | 2.4 |
| MD20-5-2-26                                            | 99  | 341 | 0.29 | 0.0466 | 0.0019 | 0.2500 | 0.0103 | 0.0389 | 0.0004 | 31.6 | 96.3  | 227 | 8.4 | 246 | 2.5 |
| MD20-5-2-27                                            | 130 | 492 | 0.27 | 0.0508 | 0.0017 | 0.2674 | 0.0084 | 0.0382 | 0.0004 | 232  | 75.9  | 241 | 6.7 | 242 | 2.2 |
| MD20-5-2-28                                            | 182 | 591 | 0.31 | 0.0499 | 0.0015 | 0.2644 | 0.0080 | 0.0384 | 0.0004 | 191  | 68.5  | 238 | 6.5 | 243 | 2.2 |



**Table S3.** The result of major oxides (wt%) and trace element ( $\times 10^{-6}$ ) of Madeng dacite.

| Sample                         | MD19-7-1 | MD20-1-1 | MD20-1-2 | MD20-5-2 | MD20-7-1 | MD20-7-2 | MD20-8-1 |
|--------------------------------|----------|----------|----------|----------|----------|----------|----------|
| SiO <sub>2</sub>               | 69.65    | 68.55    | 67.80    | 67.08    | 68.29    | 68.26    | 70.51    |
| TiO <sub>2</sub>               | 0.84     | 0.53     | 0.56     | 0.77     | 0.68     | 0.73     | 0.28     |
| Al <sub>2</sub> O <sub>3</sub> | 14.39    | 13.21    | 13.81    | 13.95    | 12.91    | 13.61    | 13.88    |
| FeO <sup>T</sup>               | 2.16     | 3.87     | 3.97     | 5.40     | 5.23     | 4.84     | 3.61     |
| Fe <sub>2</sub> O <sub>3</sub> | 1.47     | 0.79     | 0.78     | 2.91     | 2.13     | 1.82     | 3.28     |
| FeO                            | 0.84     | 3.16     | 3.26     | 2.78     | 3.32     | 3.20     | 0.66     |
| CaO                            | 0.27     | 1.23     | 0.84     | 0.36     | 0.83     | 0.41     | 0.21     |
| Na <sub>2</sub> O              | 2.02     | 2.28     | 2.21     | 2.58     | 2.11     | 2.02     | 1.99     |
| K <sub>2</sub> O               | 4.95     | 5.18     | 5.84     | 4.39     | 4.96     | 5.33     | 6.67     |
| MgO                            | 0.62     | 1.17     | 0.93     | 1.56     | 1.69     | 1.76     | 1.19     |
| MnO                            | 0.01     | 0.05     | 0.05     | 0.04     | 0.05     | 0.03     | 0.01     |
| P <sub>2</sub> O <sub>5</sub>  | 0.16     | 0.14     | 0.15     | 0.14     | 0.15     | 0.16     | 0.19     |
| LOI                            | 3.04     | 3.50     | 3.76     | 2.88     | 2.17     | 1.85     | 1.00     |
| Total                          | 98.35    | 100.13   | 100.33   | 99.77    | 99.66    | 99.54    | 99.94    |
| Mg#                            | 33.83    | 34.97    | 29.39    | 33.97    | 36.53    | 39.29    | 37.05    |
| A/NK                           | 1.66     | 1.41     | 1.39     | 1.54     | 1.46     | 1.50     | 1.32     |
| A/CNK                          | 1.57     | 1.14     | 1.20     | 1.44     | 1.25     | 1.38     | 1.28     |
| DI                             | 80.97    | 79.28    | 78.88    | 79.79    | 84.28    | 80.09    | 87.80    |
| Cs                             | 21.60    | 6.81     | 7.91     | 10.50    | 2.91     | 15.20    | 12.50    |
| Rb                             | 235.00   | 213.00   | 254.79   | 107.00   | 187.42   | 251.00   | 232.00   |
| Ba                             | 284.00   | 703.00   | 792.99   | 185.00   | 755.60   | 619.00   | 1228.00  |
| Th                             | 25.30    | 22.80    | 22.91    | 23.70    | 21.97    | 25.90    | 26.7.00  |
| U                              | 4.89     | 5.26     | 5.41     | 5.32     | 5.65     | 5.51     | 4.67     |
| Nb                             | 15.30    | 11.70    | 11.84    | 15.10    | 13.36    | 14.50    | 17.00    |
| Ta                             | 1.34     | 1.02     | 0.99     | 1.25     | 1.04     | 1.18     | 1.25     |
| La                             | 56.10    | 39.80    | 41.52    | 47.10    | 34.83    | 41.80    | 47.80    |
| Ce                             | 117.00   | 77.70    | 81.10    | 93.30    | 67.43    | 83.30    | 94.50    |
| Pr                             | 13.30    | 8.74     | 9.17     | 10.50    | 7.60     | 9.38     | 10.70    |
| Nd                             | 51.30    | 32.40    | 33.19    | 39.20    | 28.54    | 35.00    | 40.20    |
| Sm                             | 9.36     | 6.23     | 7.08     | 7.73     | 6.11     | 6.92     | 7.82     |
| Eu                             | 1.49     | 1.07     | 0.96     | 1.05     | 0.96     | 0.93     | 1.05     |
| Gd                             | 8.11     | 5.76     | 6.22     | 7.31     | 5.47     | 6.44     | 6.72     |
| Tb                             | 1.17     | 0.92     | 0.94     | 1.11     | 0.83     | 1.06     | 1.02     |
| Dy                             | 6.86     | 5.87     | 5.52     | 6.71     | 4.70     | 6.34     | 6.13     |
| Ho                             | 1.30     | 1.16     | 1.10     | 1.34     | 0.97     | 1.30     | 1.20     |
| Er                             | 3.89     | 3.25     | 3.24     | 3.82     | 2.90     | 3.74     | 3.60     |
| Tm                             | 0.55     | 0.49     | 0.48     | 0.57     | 0.43     | 0.55     | 0.52     |
| Yb                             | 3.78     | 3.05     | 3.14     | 3.75     | 2.84     | 3.50     | 3.26     |
| Lu                             | 0.53     | 0.45     | 0.45     | 0.55     | 0.44     | 0.53     | 0.50     |
| Zr                             | 301.00   | 207.00   | 219.02   | 294.00   | 258.95   | 257.00   | 258.00   |
| Hf                             | 10.00    | 5.76     | 5.77     | 9.30     | 6.82     | 6.91     | 7.18     |
| Sr                             | 51.60    | 42.90    | 66.67    | 39.40    | 45.41    | 62.60    | 40.90    |
| Y                              | 33.30    | 32.90    | 34.29    | 34.80    | 28.06    | 37.30    | 34.10    |
| Pb                             | 8.39     | 16.40    | 14.33    | 4.98     | 4.24     | 20.80    | 51.40    |
| V                              | 60.90    | 40.10    | 41.41    | 62.60    | 53.60    | 56.60    | 8.60     |
| Co                             | 6.19     | 7.26     | 7.73     | 12.00    | 10.07    | 11.30    | 1.02     |
| Ni                             | 52.10    | 14.50    | 12.70    | 26.50    | 15.77    | 17.10    | 2.87     |
| Ga                             | 20.10    | 17.20    | 18.46    | 18.40    | 17.32    | 18.70    | 15.70    |
| Sc                             | 12.20    | 7.67     | 7.17     | 11.80    | 9.70     | 10.60    | 5.13     |
| ΣREE                           | 274.74   | 186.91   | 194.11   | 224.04   | 164.05   | 200.85   | 224.91   |
| LaN/YbN                        | 10.65    | 9.36     | 9.48     | 9.01     | 8.79     | 8.56     | 10.51    |
| δEu                            | 0.51     | 0.54     | 0.43     | 0.42     | 0.50     | 0.42     | 0.43     |
| LREE/HREE                      | 8.20     | 7.92     | 7.83     | 7.90     | 9.49     | 7.56     | 8.80     |
| Nb/Ta                          | 12.01    | 11.51    | 12.80    | 12.08    | 11.42    | 12.27    | 13.62    |
| Th/U                           | 4.23     | 4.34     | 3.89     | 4.45     | 5.17     | 4.71     | 5.73     |

**Table S4.** Zircon Lu-Hf isotope data of Madeng dacite.

| Spot No.                                              | Age (Ma) | <sup>176</sup> Yb/ <sup>177</sup> Hf | 2σ       | <sup>176</sup> Lu/ <sup>177</sup> Hf | 2σ       | <sup>176</sup> Hf/ <sup>177</sup> Hf | 2σ       | ( <sup>176</sup> Hf/ <sup>177</sup> Hf) <sub>i</sub> | ε <sub>Hf</sub> (0) | ε <sub>Hf</sub> (t) | T <sub>DM1</sub> (Ma) | T <sub>DM2</sub> (Ma) | f <sub>Lu/Hf</sub> |
|-------------------------------------------------------|----------|--------------------------------------|----------|--------------------------------------|----------|--------------------------------------|----------|------------------------------------------------------|---------------------|---------------------|-----------------------|-----------------------|--------------------|
| MD20-1-2, dacite, 23 spots, Age=243.5±0.9Ma(MSWD=1.1) |          |                                      |          |                                      |          |                                      |          |                                                      |                     |                     |                       |                       |                    |
| MD20-1-2-01                                           | 243      | 0.081693                             | 0.000830 | 0.002371                             | 0.000035 | 0.282385                             | 0.000014 | 0.282372                                             | -13.69              | -8.73               | 1270                  | 1824                  | -0.93              |
| MD20-1-2-02                                           | 244      | 0.029825                             | 0.000404 | 0.000914                             | 0.000009 | 0.282229                             | 0.000011 | 0.282223                                             | -19.21              | -13.99              | 1438                  | 2157                  | -0.97              |



|                                                       |     |          |          |          |          |          |          |          |        |        |      |      |       |
|-------------------------------------------------------|-----|----------|----------|----------|----------|----------|----------|----------|--------|--------|------|------|-------|
| MD20-1-2-03                                           | 240 | 0.048360 | 0.000410 | 0.001425 | 0.000009 | 0.282343 | 0.000010 | 0.282334 | -15.18 | -10.14 | 1297 | 1910 | -0.96 |
| MD20-1-2-04                                           | 243 | 0.044492 | 0.000141 | 0.001307 | 0.000007 | 0.282360 | 0.000010 | 0.282352 | -14.58 | -9.44  | 1269 | 1869 | -0.96 |
| MD20-1-2-05                                           | 245 | 0.049622 | 0.000271 | 0.001468 | 0.000007 | 0.282337 | 0.000010 | 0.282328 | -15.39 | -10.25 | 1307 | 1921 | -0.96 |
| MD20-1-2-06                                           | 244 | 0.051518 | 0.000262 | 0.001464 | 0.000002 | 0.282356 | 0.000010 | 0.282347 | -14.71 | -9.56  | 1279 | 1878 | -0.96 |
| MD20-1-2-07                                           | 246 | 0.044069 | 0.000231 | 0.001251 | 0.000004 | 0.282347 | 0.000010 | 0.282339 | -15.03 | -9.84  | 1285 | 1896 | -0.96 |
| MD20-1-2-08                                           | 248 | 0.040643 | 0.000330 | 0.001226 | 0.000005 | 0.282341 | 0.000012 | 0.282333 | -15.25 | -10.01 | 1293 | 1908 | -0.96 |
| MD20-1-2-09                                           | 241 | 0.052957 | 0.000304 | 0.001497 | 0.000003 | 0.282366 | 0.000011 | 0.282357 | -14.37 | -9.32  | 1267 | 1859 | -0.95 |
| MD20-1-2-11                                           | 247 | 0.053718 | 0.000321 | 0.001565 | 0.000005 | 0.282355 | 0.000010 | 0.282346 | -14.74 | -9.57  | 1284 | 1879 | -0.95 |
| MD20-1-2-12                                           | 245 | 0.049921 | 0.000316 | 0.001418 | 0.000008 | 0.282344 | 0.000011 | 0.282335 | -15.14 | -10.00 | 1295 | 1904 | -0.96 |
| MD20-1-2-13                                           | 238 | 0.054859 | 0.000278 | 0.001602 | 0.000003 | 0.282367 | 0.000010 | 0.282358 | -14.33 | -9.33  | 1269 | 1859 | -0.95 |
| MD20-1-2-14                                           | 240 | 0.050542 | 0.000221 | 0.001448 | 0.000007 | 0.282384 | 0.000010 | 0.282375 | -13.74 | -8.70  | 1240 | 1819 | -0.96 |
| MD20-1-2-18                                           | 239 | 0.049564 | 0.000241 | 0.001432 | 0.000004 | 0.282345 | 0.000011 | 0.282337 | -15.09 | -10.06 | 1293 | 1904 | -0.96 |
| MD20-1-2-19                                           | 245 | 0.055993 | 0.000454 | 0.001528 | 0.000010 | 0.282321 | 0.000011 | 0.282312 | -15.96 | -10.81 | 1332 | 1958 | -0.95 |
| MD20-1-2-21                                           | 242 | 0.047680 | 0.000159 | 0.001314 | 0.000005 | 0.282352 | 0.000012 | 0.282344 | -14.86 | -9.74  | 1280 | 1887 | -0.96 |
| MD20-1-2-22                                           | 242 | 0.044810 | 0.000350 | 0.001240 | 0.000005 | 0.282335 | 0.000011 | 0.282327 | -15.47 | -10.35 | 1302 | 1925 | -0.96 |
| MD20-1-2-23                                           | 246 | 0.056109 | 0.000310 | 0.001530 | 0.000004 | 0.282383 | 0.000012 | 0.282374 | -13.74 | -8.60  | 1243 | 1817 | -0.95 |
| MD20-1-2-24                                           | 242 | 0.060776 | 0.000225 | 0.001610 | 0.000013 | 0.282346 | 0.000012 | 0.282337 | -15.05 | -9.99  | 1298 | 1902 | -0.95 |
| MD20-1-2-25                                           | 247 | 0.057986 | 0.000451 | 0.001581 | 0.000008 | 0.282336 | 0.000011 | 0.282327 | -15.42 | -10.25 | 1312 | 1923 | -0.95 |
| MD20-1-2-26                                           | 243 | 0.047822 | 0.000264 | 0.001305 | 0.000003 | 0.282359 | 0.000010 | 0.282351 | -14.60 | -9.49  | 1270 | 1871 | -0.96 |
| MD20-1-2-27                                           | 245 | 0.044203 | 0.000362 | 0.001201 | 0.000006 | 0.282339 | 0.000011 | 0.282332 | -15.30 | -10.10 | 1294 | 1912 | -0.96 |
| MD20-1-2-28                                           | 246 | 0.061554 | 0.000604 | 0.001642 | 0.000009 | 0.282373 | 0.000010 | 0.282364 | -14.10 | -8.95  | 1261 | 1840 | -0.95 |
| MD20-5-2, dacite, 22 spots, Age=241.7±1.1Ma(MSWD=1.6) |     |          |          |          |          |          |          |          |        |        |      |      |       |
| MD20-5-2-01                                           | 243 | 0.044082 | 0.000193 | 0.001327 | 0.000002 | 0.282357 | 0.000010 | 0.282349 | -14.66 | -9.55  | 1273 | 1875 | -0.96 |
| MD20-5-2-02                                           | 243 | 0.058912 | 0.000268 | 0.001798 | 0.000012 | 0.282326 | 0.000011 | 0.282316 | -15.76 | -10.72 | 1333 | 1948 | -0.95 |
| MD20-5-2-03                                           | 238 | 0.058495 | 0.000254 | 0.001745 | 0.000004 | 0.282371 | 0.000010 | 0.282362 | -14.17 | -9.20  | 1267 | 1850 | -0.95 |
| MD20-5-2-04                                           | 238 | 0.059158 | 0.000428 | 0.001764 | 0.000014 | 0.282377 | 0.000010 | 0.282367 | -13.97 | -9.02  | 1260 | 1838 | -0.95 |
| MD20-5-2-05                                           | 244 | 0.040132 | 0.000482 | 0.001212 | 0.000008 | 0.282353 | 0.000012 | 0.282345 | -14.82 | -9.66  | 1276 | 1884 | -0.96 |
| MD20-5-2-07                                           | 242 | 0.052724 | 0.000221 | 0.001612 | 0.000008 | 0.282375 | 0.000015 | 0.282365 | -14.06 | -9.01  | 1258 | 1839 | -0.95 |
| MD20-5-2-08                                           | 238 | 0.042945 | 0.000217 | 0.001286 | 0.000002 | 0.282355 | 0.000010 | 0.282347 | -14.76 | -9.73  | 1275 | 1883 | -0.96 |
| MD20-5-2-09                                           | 241 | 0.052964 | 0.000251 | 0.001603 | 0.000008 | 0.282357 | 0.000010 | 0.282347 | -14.69 | -9.67  | 1283 | 1880 | -0.95 |
| MD20-5-2-10                                           | 241 | 0.051243 | 0.000306 | 0.001447 | 0.000004 | 0.282365 | 0.000010 | 0.282356 | -14.41 | -9.35  | 1267 | 1862 | -0.96 |
| MD20-5-2-12                                           | 240 | 0.040803 | 0.000626 | 0.001190 | 0.000013 | 0.282320 | 0.000011 | 0.282313 | -15.98 | -10.89 | 1321 | 1959 | -0.96 |
| MD20-5-2-13                                           | 239 | 0.059272 | 0.000190 | 0.001669 | 0.000003 | 0.282384 | 0.000011 | 0.282375 | -13.72 | -8.72  | 1247 | 1821 | -0.95 |
| MD20-5-2-15                                           | 243 | 0.047369 | 0.000080 | 0.001359 | 0.000004 | 0.282331 | 0.000010 | 0.282323 | -15.59 | -10.47 | 1311 | 1934 | -0.96 |



|             |     |          |          |          |          |          |          |          |        |        |      |      |       |
|-------------|-----|----------|----------|----------|----------|----------|----------|----------|--------|--------|------|------|-------|
| MD20-5-2-16 | 239 | 0.052745 | 0.000136 | 0.001458 | 0.000005 | 0.282348 | 0.000012 | 0.28234  | -14.99 | -9.95  | 1290 | 1898 | -0.96 |
| MD20-5-2-17 | 239 | 0.046084 | 0.000228 | 0.001281 | 0.000005 | 0.282343 | 0.000011 | 0.282336 | -15.16 | -10.10 | 1291 | 1908 | -0.96 |
| MD20-5-2-19 | 245 | 0.048413 | 0.000229 | 0.001389 | 0.000008 | 0.282358 | 0.000010 | 0.28235  | -14.64 | -9.48  | 1274 | 1873 | -0.96 |
| MD20-5-2-20 | 239 | 0.056194 | 0.000480 | 0.001579 | 0.000011 | 0.282342 | 0.000010 | 0.282333 | -15.22 | -10.19 | 1304 | 1915 | -0.95 |
| MD20-5-2-21 | 246 | 0.048394 | 0.000054 | 0.001325 | 0.000005 | 0.282368 | 0.000011 | 0.28236  | -14.30 | -9.10  | 1258 | 1850 | -0.96 |
| MD20-5-2-22 | 247 | 0.048180 | 0.000226 | 0.001380 | 0.000004 | 0.282358 | 0.000010 | 0.28235  | -14.64 | -9.42  | 1274 | 1872 | -0.96 |
| MD20-5-2-23 | 244 | 0.045726 | 0.000092 | 0.001302 | 0.000004 | 0.282350 | 0.000011 | 0.282342 | -14.93 | -9.77  | 1283 | 1891 | -0.96 |
| MD20-5-2-24 | 245 | 0.038948 | 0.000243 | 0.001133 | 0.000003 | 0.282352 | 0.000012 | 0.282344 | -14.86 | -9.64  | 1274 | 1884 | -0.97 |
| MD20-5-2-26 | 246 | 0.056851 | 0.000343 | 0.001566 | 0.000003 | 0.282365 | 0.000011 | 0.282356 | -14.38 | -9.23  | 1270 | 1858 | -0.95 |
| MD20-5-2-27 | 242 | 0.045850 | 0.000643 | 0.001307 | 0.000014 | 0.282350 | 0.000010 | 0.282342 | -14.93 | -9.83  | 1283 | 1892 | -0.96 |

Table S5. Whole-rock Sr-Nd isotope data of Madeng dacite.

| Sample   | Lithology | Rb( $10^{-6}$ ) | Sr( $10^{-6}$ ) | $^{87}\text{Rb}/^{86}\text{Sr}$ | $^{87}\text{Sr}/^{86}\text{Sr}$ | $2\sigma$ | $(^{87}\text{Sr}/^{86}\text{Sr})_i$ | Sm( $10^{-6}$ ) | Nd( $10^{-6}$ ) | $^{147}\text{Sm}/^{144}\text{Nd}$ | $^{143}\text{Nd}/^{144}\text{Nd}$ | $2\sigma$ | $\epsilon_{\text{Nd}}(t)$ | $T_{\text{DM1}}$ | $T_{\text{DM2}}$ |
|----------|-----------|-----------------|-----------------|---------------------------------|---------------------------------|-----------|-------------------------------------|-----------------|-----------------|-----------------------------------|-----------------------------------|-----------|---------------------------|------------------|------------------|
| MD19-7-1 | dacite    | 235             | 51.6            | 13.576260                       | 0.753399                        | 0.000007  | 0.706665                            | 9.36            | 51.3            | 0.110288                          | 0.511956                          | 0.000005  | -10.64                    | 1759             | 1881             |
| MD20-1-2 | dacite    | 255             | 66.7            | 11.391783                       | 0.746274                        | 0.000006  | 0.706898                            | 7.08            | 33.2            | 0.128869                          | 0.511952                          | 0.000005  | -11.28                    | 2149             | 1933             |
| MD20-5-2 | dacite    | 107             | 39.4            | 8.095609                        | 0.738721                        | 0.000007  | 0.710853                            | 7.73            | 39.2            | 0.119196                          | 0.511942                          | 0.000005  | -11.19                    | 1946             | 1925             |
| MD20-7-1 | dacite    | 187             | 45.4            | 12.305012                       | 0.751525                        | 0.000007  | 0.709167                            | 6.11            | 28.5            | 0.129363                          | 0.511966                          | 0.000005  | -11.03                    | 2136             | 1911             |
